# Supplementary material for: Dynamic Interaction of USP14 with the Chaperone HSC70 Mediates Crosstalk between the Proteasome, ER Signaling, and Autophagy
Source: PubMed Central journal article supplement — iScience. 2019 Dec 19;23(1):100790. doi: 10.1016/j.isci.2019.100790 (PMC6941875; doi:10.1016/j.isci.2019.100790), 2019-12-19
Supplement: mmc1.pdf [file mmc1.pdf]

**ISCI, Volume 23**

**Supplemental Information**

**Dynamic Interaction of USP14 with the Chaperone**

**HSC70 Mediates Crosstalk between**

**the Proteasome, ER Signaling, and Autophagy**

**Vignesh Srinivasan, Celine Bruelle, Enzo Scifo, Dan Duc Pham, Rabah Soliymani, Maciej Lalowski, and Dan Lindholm**

## **Supplemental Items**

**Supplemental Figures 1 and 2**

**Supplemental Figures Legends**

**Supplemental Table 1**

**Supplemental Table Legend**

**Transparent Methods**

**Supplemental References**

**A** **Figure S1**

p-ES-NTAP-Puro vector

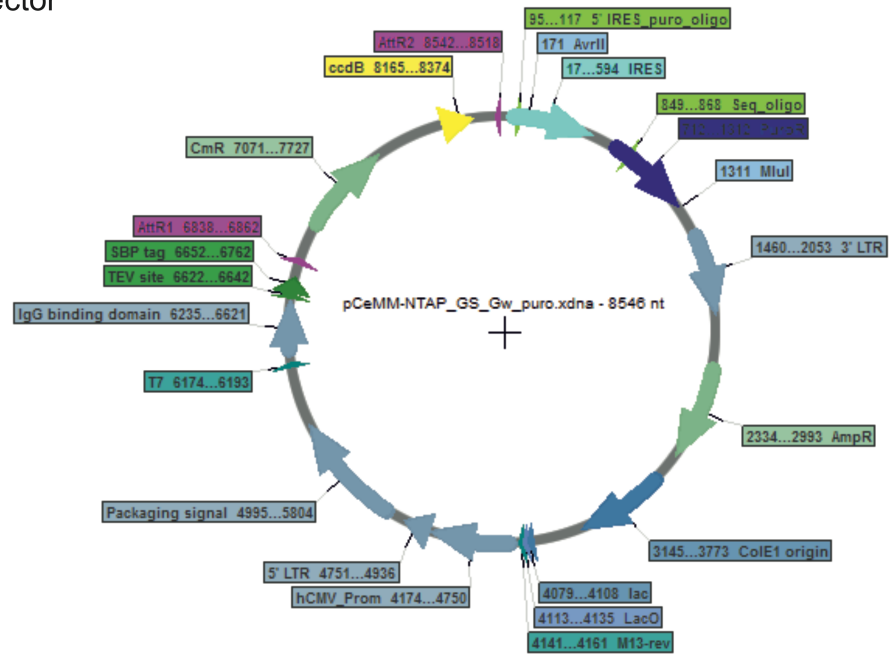

**B**

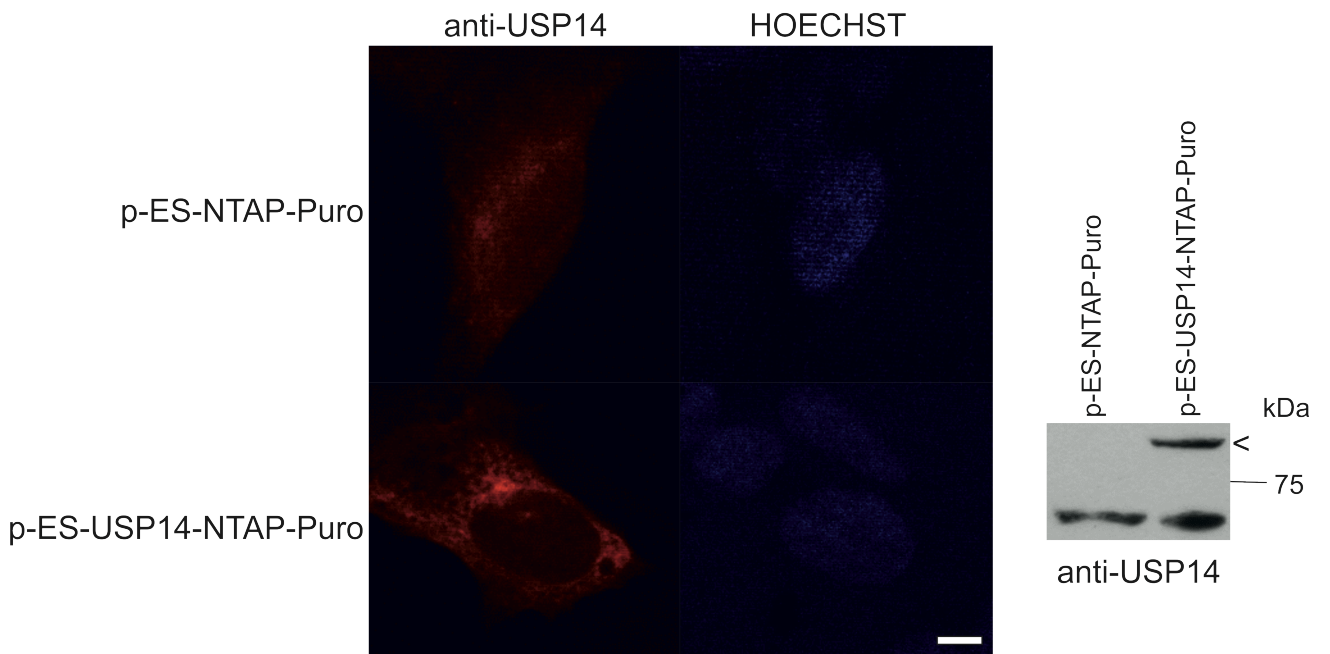

Figure S2

A

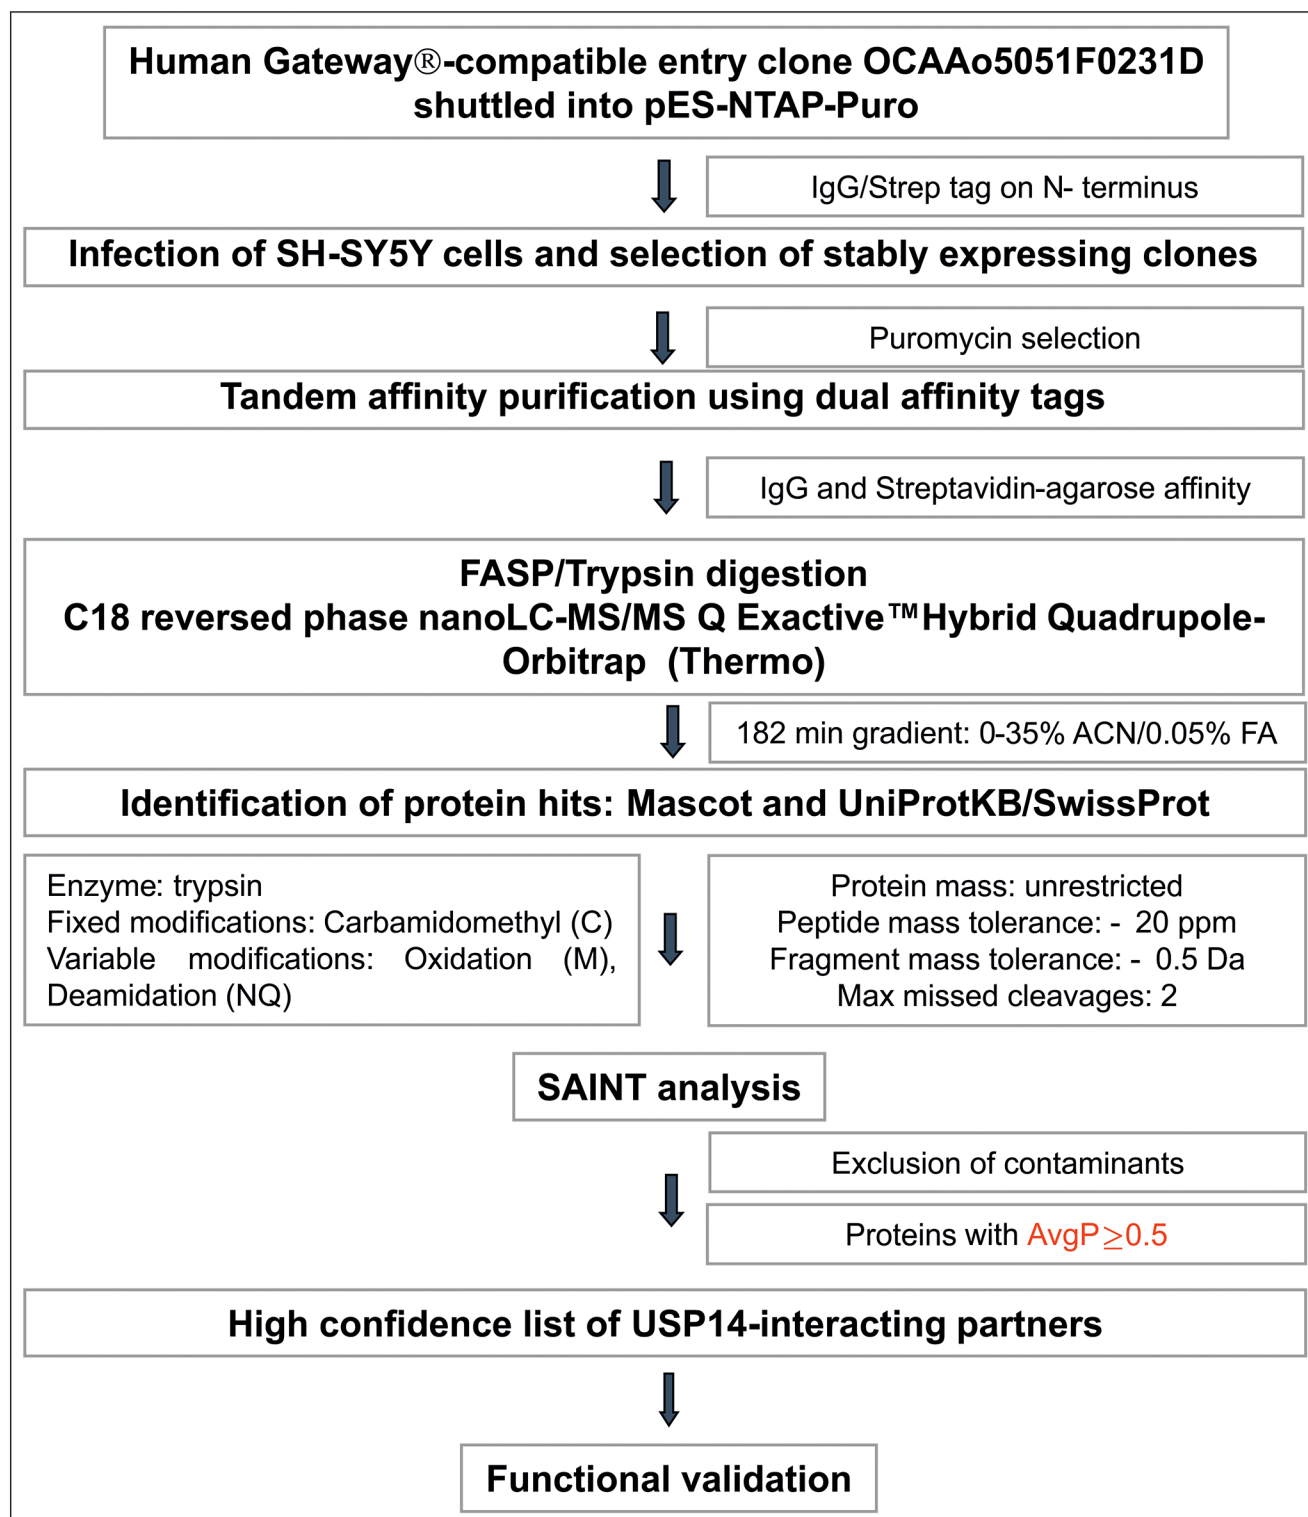

## Supplemental Figure Legends

### **Supplemental Figure 1 (Figure S1). Construction of p-ES-NTAP-Puro vector.**

#### **Related to Figure 2.**

(A) The plasmid map of pCeMM-NTAP(GS)-Gw-Puro (p-ES-NTAP-Puro) is represented. Details of vector construction are described in the Materials and methods.

(B) Expression of p-ES-NTAP-Puro-USP14 in SH-SY5Y cells was verified by immunostaining against USP14 (red). Nuclei were stained with Hoechst dye (blue). Scale bar- 100  $\mu$ m. Right panel- expression of the p-ES-NTAP-Puro-USP14 was verified by immunoblotting with USP14 antibody. The arrowhead marks the overexpressed NTAP-USP14 protein migrating at  $\sim$ 80 kDa, showing similar expression level as an endogenous USP14 (at  $\sim$ 55 kDa) in both conditions. No band at  $\sim$ 80 kDa is seen in SH-SY5Y cells expressing p-ES-NTAP-Puro vector only.

### **Supplemental Figure 2 (Figure S2). The workflow depicting the affinity purification and bioinformatic analysis of USP14 interacting partners. Related to Figure 2.**

Retroviral infection compatible vector, pES-NTAP-Puro (USP14-NTAP-Puro) was utilized to infect SH-SY5Y cells and generate stably expressing clones upon puromycin selection. Cytoplasmic extracts were subjected to tandem affinity purification using dual affinity tags followed by FASP and tryptic digestion. Peptides were analyzed by tandem mass spectrometry and the results processed using Mascot and SAINT software. Contaminants were excluded based on the AvgP threshold resulting in a high confidence list of USP14-interacting partners (Supplemental Table 1). The identified interaction was further validated in Co-IP and functional experiments.

Supplemental Table 1: SAINT analysis of USP14 interacting partners in pES-NTAP-Puro-USP14 stably expressing SHSYSY-5Y cells recovered by TAP-MS. Related to Figure 2.

| Bait  | Prey        | PreyGene | Spec  | SpecSum | AvgSpec | NumReplicates | ctrlCounts | AvgP | MaxP | TopoAvgP | TopoMaxP | SaintScore | logOddsScore | FoldChange | BFDR | maxSpec | PreyGeneID | PreyGeneName | Project_Frequency | Shared_Frequency | BioGrid                 |
|-------|-------------|----------|-------|---------|---------|---------------|------------|------|------|----------|----------|------------|--------------|------------|------|---------|------------|--------------|-------------------|------------------|-------------------------|
| USP14 | HSP7C_HUMAN | HSPA8    | 2/4   | 6       | 3       | 2             | 0/0        | 0.99 | 1    | 1        | 1        | 1          | 6.02         | 30         | 0    | 4       | 3312       | HSPA8        | 76.92             | 100              | novel                   |
| USP14 | IGHG2_HUMAN | IGHG2    | 3/3   | 6       | 3       | 2             | 0/0        | 1    | 1    | 1        | 1        | 1          | 5.41         | 30         | 0    | 3       | 3501       | IGHG2        | 92.31             | 100              | TAP contaminant         |
| USP14 | PRS4_HUMAN  | PSMC1    | 10/16 | 26      | 13      | 2             | 0/0        | 1    | 1    | 1        | 1        | 1          | 38.9         | 130        | 0    | 16      | 5700       | PSMC1        |                   | 100              | reported                |
| USP14 | PRS7_HUMAN  | PSMC2    | 7/11  | 18      | 9       | 2             | 0/0        | 1    | 1    | 1        | 1        | 1          | 31.4         | 90         | 0    | 11      | 5701       | PSMC2        | 23.08             | 100              | reported                |
| USP14 | PRS6A_HUMAN | PSMC3    | 4/11  | 15      | 7.5     | 2             | 0/0        | 1    | 1    | 1        | 1        | 1          | 25.77        | 75         | 0    | 11      | 5702       | PSMC3        | 15.38             | 100              | reported                |
| USP14 | PRS8_HUMAN  | PSMC5    | 5/6   | 11      | 5.5     | 2             | 0/0        | 1    | 1    | 1        | 1        | 1          | 29.21        | 55         | 0    | 6       | 5705       | PSMC5        | 15.38             | 100              | reported                |
| USP14 | PSMD1_HUMAN | PSMD1    | 4/14  | 18      | 9       | 2             | 0/0        | 1    | 1    | 1        | 1        | 1          | 24.72        | 90         | 0    | 14      | 5707       | PSMD1        | 15.38             | 100              | reported                |
| USP14 | PSMD2_HUMAN | PSMD2    | 9/16  | 25      | 12.5    | 2             | 0/0        | 1    | 1    | 1        | 1        | 1          | 35.95        | 125        | 0    | 16      | 5708       | PSMD2        | 15.38             | 100              | reported                |
| USP14 | PSMD3_HUMAN | PSMD3    | 8/12  | 20      | 10      | 2             | 0/0        | 1    | 1    | 1        | 1        | 1          | 35.09        | 100        | 0    | 12      | 5709       | PSMD3        |                   | 100              | reported                |
| USP14 | PSMD4_HUMAN | PSMD4    | 3/5   | 8       | 4       | 2             | 0/0        | 1    | 1    | 1        | 1        | 1          | 23.33        | 40         | 0    | 5       | 5710       | PSMD4        |                   | 100              | reported                |
| USP14 | HORN_HUMAN  | HRNR     | 8/4   | 12      | 6       | 2             | 0/3        | 0.84 | 0.96 | 0.69     | 0.9      | 0.84       | -0.07        | 4          | 0    | 8       | 38697      | HRNR         | 84.62             | 100              | statistical contaminant |
| USP14 | ADRM1_HUMAN | ADRM1    | 1/5   | 6       | 3       | 2             | 0/0        | 0.5  | 1    | 0.5      | 1        | 0.5        | 15.24        | 30         | 0.12 | 5       | 11047      | ADRM1        |                   | 100              | reported                |
| USP14 | PSA1_HUMAN  | PSMA1    | 0/2   | 2       | 1       | 2             | 0/0        | 0.49 | 0.99 | 0.5      | 1        | 0.5        | 3.59         | 10         | 0.28 | 2       | 5682       | PSMA1        |                   | 100              | novel                   |
| USP14 | PSA2_HUMAN  | PSMA2    | 1/4   | 5       | 2.5     | 2             | 0/0        | 0.5  | 1    | 0.5      | 1        | 0.5        | 13.48        | 25         | 0.17 | 4       | 5683       | PSMA2        | 7.69              | 100              | reported                |
| USP14 | PSA3_HUMAN  | PSMA3    | 1/4   | 5       | 2.5     | 2             | 0/0        | 0.5  | 1    | 0.5      | 1        | 0.5        | 16.29        | 25         | 0.17 | 4       | 5684       | PSMA3        |                   | 100              | reported                |
| USP14 | PSA5_HUMAN  | PSMA5    | 0/3   | 3       | 1.5     | 2             | 0/0        | 0.5  | 1    | 0.5      | 1        | 0.5        | 5.7          | 15         | 0.2  | 3       | 5686       | PSMA5        | 15.38             | 100              | reported                |
| USP14 | PSA6_HUMAN  | PSMA6    | 0/3   | 3       | 1.5     | 2             | 0/0        | 0.5  | 1    | 0.5      | 1        | 0.5        | 8.51         | 15         | 0.2  | 3       | 5687       | PSMA6        |                   | 100              | reported                |
| USP14 | PSA7_HUMAN  | PSMA7    | 0/6   | 6       | 3       | 2             | 0/0        | 0.5  | 1    | 0.5      | 1        | 0.5        | 6.4          | 30         | 0.09 | 6       | 5688       | PSMA7        |                   | 100              | novel                   |
| USP14 | PSB1_HUMAN  | PSMB1    | 0/2   | 2       | 1       | 2             | 0/0        | 0.49 | 0.99 | 0.5      | 1        | 0.5        | 5            | 10         | 0.28 | 2       | 5689       | PSMB1        |                   | 100              | reported                |
| USP14 | PSB5_HUMAN  | PSMB5    | 0/8   | 8       | 4       | 2             | 0/0        | 0.5  | 1    | 0.5      | 1        | 0.5        | 9.92         | 40         | 0.02 | 8       | 5693       | PSMB5        |                   | 100              | reported                |
| USP14 | PSB6_HUMAN  | PSMB6    | 0/3   | 3       | 1.5     | 2             | 0/0        | 0.5  | 1    | 0.5      | 1        | 0.5        | 7.11         | 15         | 0.2  | 3       | 5694       | PSMB6        |                   | 100              | novel                   |
| USP14 | PSB7_HUMAN  | PSMB7    | 0/3   | 3       | 1.5     | 2             | 0/0        | 0.5  | 1    | 0.5      | 1        | 0.5        | 7.81         | 15         | 0.2  | 3       | 5695       | PSMB7        |                   | 100              | novel                   |
| USP14 | PRS6B_HUMAN | PSMC4    | 0/5   | 5       | 2.5     | 2             | 0/0        | 0.5  | 1    | 0.5      | 1        | 0.5        | 9.92         | 25         | 0.12 | 5       | 5704       | PSMC4        | 23.08             | 100              | reported                |
| USP14 | PRS10_HUMAN | PSMC6    | 1/8   | 9       | 4.5     | 2             | 0/0        | 0.5  | 1    | 0.5      | 1        | 0.5        | 16.84        | 45         | 0.02 | 8       | 5706       | PSMC6        |                   | 100              | reported                |
| USP14 | PSD11_HUMAN | PSMD11   | 2/11  | 3       | 1.5     | 2             | 0/0        | 0.49 | 0.99 | 0.5      | 1        | 0.5        | 18.05        | 15         | 0.28 | 2       | 5717       | PSMD11       |                   | 100              | reported                |
| USP14 | PSD12_HUMAN | PSMD12   | 0/3   | 3       | 1.5     | 2             | 0/0        | 0.5  | 1    | 0.5      | 1        | 0.5        | 5            | 15         | 0.2  | 3       | 5718       | PSMD12       | 15.38             | 100              | reported                |
| USP14 | PSMD5_HUMAN | PSMD5    | 2/1   | 3       | 1.5     | 2             | 0/0        | 0.49 | 0.99 | 0.5      | 1        | 0.5        | 13.13        | 15         | 0.28 | 2       | 5711       | PSMD5        |                   | 100              | novel                   |
| USP14 | PSMD8_HUMAN | PSMD8    | 0/2   | 2       | 1       | 2             | 0/0        | 0.49 | 0.99 | 0.5      | 1        | 0.5        | 2.89         | 10         | 0.28 | 2       | 5714       | PSMD8        |                   | 100              | novel                   |
| USP14 | RS27A_HUMAN | RPS27A   | 0/3   | 3       | 1.5     | 2             | 0/0        | 0.5  | 1    | 0.5      | 1        | 0.5        | -0.97        | 15         | 0.2  | 3       | 6233       | RPS27A       | 92.31             | 100              | statistical contaminant |

## **Supplement Table Legend**

### **Supplemental Table 1. List of interacting partners in USP14 overexpressing neuroblastoma cells. Related to Figure 2.**

Tandem affinity analyses of USP14 interacting proteins were done as described in Transparent Methods section. Peptides obtained were analyzed using Mascot and SAINT software. Contaminants were excluded based on the AvgP threshold resulting in a high confidence list of USP14-interacting partners. Several proteasome interactors of USP14 have been reported, whilst the binding to HSPA8/HSC70 was previously unrecognized.

## **Transparent Methods**

### **Cell culture and transfections**

SH-SY5Y human and Neuro2A mouse neuroblastoma cells were cultured in Dulbecco's Modified Eagle Medium (DMEM) (Lonza) supplemented with 10% fetal bovine serum (Gibco), 7.5% NaHCO<sub>3</sub>, 100 mM NA-glutamine (Gibco) and 100 mM penicillin-streptomycin (Gibco) at 37°C in 5% CO<sub>2</sub>. Striatal cell lines (kind gift from Prof. Tõnis Timmusk, Tallin University of Technology, Estonia) derived from mice expressing different huntingtin (Htt) genotypes and immortalized with a temperature sensitive large T antigen were used as previously described (Kannike et al., 2014). Control cells expressed 7-polyglutamine (7Q) repeats while the mutant cells expressed 109-polyglutamine (109Q) repeats. Cells were cultured in DMEM supplemented with 10 % fetal bovine serum (Gibco), 7.5% NaHCO<sub>3</sub>, 100 mM NA-glutamine (Gibco) and 100 mM penicillin-streptomycin (Gibco) at 33°C in 5% CO<sub>2</sub>.

Primary neuron cultures were obtained from brain cortices of embryonic E17-old rat pups, and cultured as described (Do et al., 2013). Briefly, the cortices were enzymatically dissociated by trypsin and further processed using DNase I (Roche). The solution was then centrifuged and the pellet resuspended in fresh Neurobasal solution (Gibco). The appropriate number of cells were plated onto cell culture dishes coated with poly-L-ornithine (Sigma) and cultured in Neurobasal (Gibco) medium supplemented with 50x B27 (Gibco), 25 mM glutamine (Gibco) and 100 mM penicillin-streptomycin (Gibco) at 37°C in 5% CO<sub>2</sub>. Half of the medium was replaced every two days and cells were incubated for 8 days before experiments.

Different compounds were added to the cells, including 20 µM MG132 (Calbiochem), 0.5 µM bortezomib (Calbiochem) or 5 µM Lactacystin (Sigma) for 5-6 h to inhibit the proteasome. To inhibit autophagy, 200 nM bafilomycin A1 (Sigma) or 50 µM chloroquine (Sigma) were added for 5 h and to block the activity of HSC70, 25 or 50 µM VER-155008 (Tocris Biosciences) was added for 24 h. In some experiments, 2.5 µg/ml tunicamycin (Sigma) was added for 6 h to induce the unfolded protein response (UPR). Linear Polyethylenimine 25.000 (PEI) (Polysciences, Inc.) was used for transient transfection of neurons based on the manufacturer's instructions. PEI was prepared at a stock concentration of 1 mg/ml. DNA and PEI were combined at a ratio of 1:3 for complexing. Following 24 - 48 h of transfection, different treatments were applied as above.

### **Cell viability assay**

Cell viability was assayed essentially as described previously (Hyrskyluoto et al., 2013). In brief, striatal cells expressing 7Q or 109Q Htt protein were treated with 25 µM or 50 µM VER-155008 for 24 h and cell death was measured by utilizing tetrazolium dye 3-(4,5-dimethylthiazol-2-yl)-2,5-



diphenyltetrazolium bromide (MTT, Sigma) substrate added to cells for 2 h. The insoluble formazan substrate was then reconstituted in a solvent of 0.1 M HCl-isopropanol and incubated for 30 min. with gentle agitation. Absorbance was measured at 560 nm and the value reflected the relative number of surviving cells following each treatment.

### **Expression vectors cDNAs and transfection**

Wild type human pRK-FLAG-USP14 (Flag-WT-USP14) and mutant pRK-FLAG-USP14 C114A plasmids were a kind gift from Dr Yihong Ye (Wang et al., 2006). XBP1 (Myc-DDK-tagged)-Human X-box binding protein 1 (XBP1), transcript variant 1 (hereafter referred to as XBP1u) was obtained from Origene. pcDNA5/FRT/TO-GFP-HSPA8 (GFP-WT-HSC70), Flag-HA-GFP and Flag-HA-USP14 were obtained from Addgene. eGFP-WT-USP14 (GFP-WT-USP14) was generated by amplifying USP14 cDNA from pRK-FLAG-WT-USP14 and subcloning it into eGFPc1 vector. pDestEGFP-GABARAP (EGFP-GABARAP) plasmid was a kind gift from Dr. Nikolai Engedal (University of Oslo, Norway). The point mutation of WT-USP14 to W58A-USP14 was made using the QuickChange lightning site-directed mutagenesis kit (Stratagene) following the manufacturer's instructions.

### **pCeMM-NTAP(GS)-Gw-Puro cloning strategy**

The details of pCeMM-CTAP(GS)-Gw-Puro (pES-CTAP) vector preparation were previously described (Scifo et al., 2013). In the first step, a fragment containing the IRES sequence and the puromycin ORF was amplified from pES-CTAP via PCR using the following primers: 5'-gttattttccaccatattgccc (5'-IRES\_puro) and 5'-tcttccaccggtacgcgtcaggcaccgggcttgcg (IRES\_puro-3'; AgeI and MluI sites are underlined). The PCR fragment was then digested with AvrII (singular site in IRES) and AgeI (introduced by the PCR primer). This fragment was then ligated into the AvrII-BspEI site of the vector pCeMM-NTAP(GS)Gw (Burckstummer et al., 2006), thus replacing IRES-GFP by IRES-Puro cassette from pES-CTAP vector. To achieve it, IRES-GFP was first removed from pCeMM-NTAP-GS-Gw by digesting the vector with AvrII (singular site in IRES) and Kpn2I (isoschizomer of BspEI, partial digest) thus isolating the BspEI (nt 1348) – AvrII vector band (size 7.4 kb). Potential clones were sequence verified using the following primers: 5'-gttattttccaccatattgccc (5'-IRES\_puro) and 5'-caccgagctgcaagaactc (ML\_Seq\_1). The sequence and map of the pCeMM-NTAP(GS)-Gw-Puro vector are provided in the supplemental material.

Full length USP14 (OCAAo5051F0231D) sequence verified entry clone in pENTR221 vector, purchased from Source Bioscience (OCAAo5051F0231D) was shuttled into pES-NTAP-Puro, for TAP-MS experiments, as described (Scifo et al., 2013). Recombination of DNA fragments was

performed using the LR clonase reaction (Life Technologies Europe BV, Espoo, Finland) and analyzed with BsrGI restriction enzyme.

### **Construct for shRNA against USP14**

SHC002 Non-Mammalian (scramble shRNA) Negative control and constructs against human USP14 were purchased from TRC1 library in a backbone of pLKO.1 vector (Sigma). Five shRNA constructs were tested for efficient USP14 knockdown (KD) by immunoblotting for USP14 and the best constructs were then chosen for generation of SH-SY5Y USP14 KD cells. These constructs were TRCN0000007425 (USP14 shRNA1) and TRCN0000007428 (USP14 shRNA2).

### **Generation of SH-SY5Y human neuroblastoma cells with knockdown of USP14**

Lentivirus particles expressing shRNA constructs were generated at the Biomedicum Functional Genomics Unit, University of Helsinki, Finland. SH-SY5Y cells were seeded into 6-well plates and transduced with lentiviral particles containing shRNA the following day. Following 48 h of virus infection, the antibiotic selection was performed by changing medium with fresh DMEM containing 1 µg/ml puromycin (Gibco, Life technologies). The shRNA constructs exhibiting the best USP14 KD efficiency were further chosen for expansion, referred to as USP14 shRNA1 and USP14 shRNA2 cell clones. SH-SY5Y cells transduced with scramble shRNA expressing viruses were used as a control. Selection pressure with puromycin was maintained during propagation and the medium was changed every 3 days with fresh DMEM containing puromycin.

### **TAP purification**

Monolayer cells were harvested from three 150 mm plates of USP14-NTAP-Puro or NTAP-Puro infected SH-SY5Y cells, grown to 80% confluency ( $1 \times 10^8$  cells). Preparation of cytoplasmic extract from the cells was performed as previously described (Scifo et al., 2013), while the TAP purification procedure followed by FASP preparation prior to MS analysis as in (Scifo et al., 2015a). The Lys-C and trypsin peptide digests were processed on Zip-Tip C18 reversed phase (Merck Millipore) according to manufacturer protocol. Peptide digests were resuspended in 1% TFA and sonicated in a water bath for 1 min. The peptide mixture was applied onto a C-18 reverse phase pre-column (nanoACQUITY Symmetry® C18, Waters) using 0.1% TFA as mobile phase and then separated on a nano-UPLC C-18 column (nanoACQUITY BEH C18, Waters) with an 0.05% formic acid in a gradient of acetonitrile (0–35% ACN in 182 min), at a flow rate of 250 nl/min, and analyzed on Q Exactive™Hybrid Quadrupole-Orbitrap (Thermo Scientific), as described (Scifo et al., 2015a). MS/MS peak lists or spectral data were searched with the Mascot Daemon interface (version 2.4.0;

Matrix Science, Uni. of Helsinki) against the Swiss-Prot 2018\_05 database (20350 sequences), with taxonomy set to Homo sapiens. Carbamidomethyl-Cys, met oxidation and N/Q residues deamidation were used as fixed and variable modifications, respectively. Mass tolerance of the precursor ions was set to 20 ppm, and of MS/MS fragment ions to 0.5 Da. The peptide charges were set to 1-3, and 2 tryptic mis-cleavages were allowed. SAINT analysis was performed as previously described (Scifo et al., 2013), except that two biological replicates were used for the bait (USP14) and negative control (empty pES-NTAP-Puro vector). Protein hits that passed the threshold of an AvgP  $\geq 0.5$  were considered as true USP14 interactors, after exclusion of an empty pES-NTAP-Puro vector contaminants (Scifo et al., 2013; Scifo et al., 2015a, b), statistical contaminants ([www.crapome.org](http://www.crapome.org)) and checking for those matching the list of previously identified USP14 interacting partners (see compendium in BioGRID 3.5 database; [Biogrid/homo-sapiens/usp14](http://Biogrid/homo-sapiens/usp14)).

### **Immunoprecipitation**

Cells were lysed in a modified RIPA lysis buffer containing 50 mM Tris-HCl pH 7.7, 150 mM NaCl, 1% NP-40, and 0.5% sodium deoxycholate for 30 min. on ice. Following the lysis, the tubes were rotated for 15-30 min. at 4°C and centrifuged at 10,000g for 10 min. at 4°C. The supernatant was collected, and protein concentration was measured using the BCA protein assay kit (Pierce, Thermo Fisher Scientific). Equal amounts of protein lysates were taken and precleared using 20  $\mu$ l of prewashed Protein A/G agarose beads (Sigma) for one hour at 4°C. Pre-cleared lysate was incubated with the Anti-Flag M2 (Sigma) or Anti-USP14 (Sigma) overnight in a rotor at 4°C. The following day, BSA blocked agarose beads were added to the overnight antibody conjugated lysate mixture and was left to rotate at 4°C for 2-3 h. The antibody complexed beads were centrifuged at 9000xg for 1 min. at 4°C and washed with the lysis buffer 3-4 times on a rotator at 4°C, 5 min. each. Immunoprecipitated proteins were eluted by adding 35  $\mu$ l of 2x denaturing Laemmli buffer and heated at 95°C for 5 min. The heat-denatured samples were centrifuged for 3 min. at 10,000xg and the supernatant was collected. The 35  $\mu$ l supernatant was loaded to PAGE and the immunoprecipitated complexes were analyzed using Western blot for detecting the immunoprecipitated protein and its interacting partners. 40  $\mu$ g of lysate was used as the input control.

### **Immunoblotting**

Cells were washed twice with ice-cold PBS and lysed in RIPA buffer (150 mM NaCl, 1% Triton-X-100, 0.5% sodium deoxycholate, 1% SDS, 50 mM Tris-HCl, pH 7.4) supplemented with protease inhibitors (Roche) and phosphatase inhibitor (Phosphostop, Roche). Protein concentration measurements were performed with the BCA protein assay kit (Pierce, Thermo Fisher Scientific),

and equal amounts of protein were loaded to PAGE and blotted onto nitrocellulose membrane filters (Amersham Biosciences, Helsinki, Finland). The membranes were incubated for 1h in 5% skimmed milk or 5% bovine serum albumin, in TBS-T (50 mM Tris-HCl pH 7.5, 150 mM NaCl, 0.1% Tween 20) and then with the primary antibodies overnight at 4°C with gentle agitation. Primary antibodies used were as follows: anti-USP14 (1:500, Abgent, AP2142a); anti-USP14 (1:1000, Sigma, J6111-6D6); anti-HSC70 (1:2000, SantaCruz Biotechnology, sc7298); anti-XBP1 (detects both XBP1s running at 56 kDa and XBP1u, at 29 kDa as indicated in respective IBs and figure legends), 1:2000, Cell signaling technologies, D2C1F); anti-Actin (1:10000, Sigma, A2066); Anti-GFP (1:2000, Sigma, 11814460001); anti-Flag (1:2000, Sigma); Anti-pIRE1 $\alpha$  (phosphor S724; 1:2500, Abcam, ab48187), Anti-IRE1 $\alpha$  (1:2500, Abcam, ab37073); Anti-PSMD2 (1:1000, Thermo Fisher Scientific); anti-GABARAP (E14JE) (1:2000, CST, 13733). Following washes, the membranes were incubated with horseradish peroxidase-conjugated secondary antibodies (1:2500, Jackson ImmunoResearch Laboratories) at room temperature for 1 h with gentle agitation. Protein signals were detected using enhanced chemiluminescence substrate (Pierce, Thermo Fisher Scientific). Immunoblots were quantified with ImageJ (NIH) quantification software.

### **Immunocytochemistry**

SH-SY5Y cells or Striatal neuronal cells plated on coverslips were fixed using 4% paraformaldehyde at RT for 10 min. Fixed cells were permeabilized with 0.1% Triton-X-100 containing phosphate buffered saline (PBS-T) and blocked with 5% bovine serum albumin (Sigma) diluted in PBS-T for 1 h. The cells were incubated in XBP1u antibody (1:500; SAB2102720, Sigma) diluted in 5% BSA containing PBS-T overnight at 4°C. The coverslips were washed in PBS-T and incubated with fluorophore conjugated Alexa Fluor® 488 or 594 secondary antibody diluted in 5% BSA containing PBS-T (1:600, Invitrogen) for 2 h in dark at room temperature. Subsequently, the coverslips were washed in PBS-T and nuclei stained with Hoechst 33342 (Thermo Fisher Scientific, 62249). The coverslips were mounted onto glass slides with Mowiol (Calbiochem) containing DABCO gel mounting media. The cells were imaged using Zeiss Axioplan2 imaging universal light microscope.

### **Live cell imaging for EGFP-GABARAP positive autophagic structures**

Striatal neuronal cells transfected with EGFP-GABARAP in combination with empty vector or Flag-W58A-USP14 were imaged using the EVOS FL cell imaging system (Thermo Fisher Scientific) with a 40X objective. Imaging of GABARAP positive autophagosome at a higher resolution was performed using a Nikon Eclipse Ti-E inverted widefield microscope with full environmental chamber, Hamamatsu Orca Flash 4.0 V2 B&W camera for fluorescence and Lumencor Spectra X

light engine (Biomedicum image unit, Medicum, University of Helsinki). Briefly, striatal neurons were plated on  $\mu$ -Slide ibiTreat polymer bottom plates (80826, ibidi, Germany) and transfected with EGFP-GABARAP in combination with empty vector or Flag-W58A-USP14. Following the treatment with VER-155008 (25 $\mu$ M, 24 h) or DMSO, cells were imaged with a 100X Plan Apo VC objective (Numerical aperture, 1.40) and LED-FITC-A filter. Images were acquired using NIS-Elements advanced research with 6D image acquisition module software from Nikon.

Each experiment contained images from several fields of view. Acquired images were analyzed by ImageJ particle analysis.

### **Analysis for XBP1u ALIS and EGFP-GABARAP positive structures**

XBP1u ALIS and EGFP-GABARAP autophagic structures were considered as particles and analyzed using ImageJ ComDet v.0.4.1 plugin. Briefly, the region of interest (ROI) was defined around the cell boundary. The plugin was applied to the defined ROI to obtain the number of particles and their respective integrated intensities. To negate the cell size dependent differences in the number of particles, average integrated intensity/particle was obtained and used as a measure of changes in XBP1u ALIS or EGFP-GABARAP signal intensities between samples.

### **Deubiquitination activity assay**

The assay was performed as described earlier with a few modifications (Borodovsky et al., 2002). Neuro2A cells overexpressing Flag-WT-USP14, Flag-C114A-USP14, and Flag-W58A-USP14 were lysed in 50 mM Tris (pH 7.4), 250 mM sucrose, 5 mM MgCl<sub>2</sub>, 1mM DTT and 1mM ATP for 1h at 4°C. 50  $\mu$ g of lysates was then incubated with 3 mM ubiquitin vinyl methyl ester (HA tag; Enzo Life Science) for 3 h at 37°C. The samples were then boiled 95°C for 5 min in denaturing Laemmli buffer and analyzed by immunoblotting with anti-Flag antibodies.

### **RNA isolation and Quantitative PCR**

RNA was extracted from control 7Q and mutant 109Q expressing striatal cells using the RNeasy mini kit (Qiagen). cDNA was synthesized with SuperScript VILO (Invitrogen, Thermo Fisher Scientific) following the manufacturer's instructions. LightCycler 480 SYBR Green I MASTER (Roche Applied Science) was utilized to perform real time quantitative PCR on a LightCycler 480 (Roche Applied Science) with a 96-well block as described previously (Pham et al., 2016; Pham et al., 2019). PCR conditions were as follows: Initial incubation at 95 °C for 15 min, followed by 40 cycles at 95 °C for 15 s, 63 °C for 20 s and 72 °C for 10 s. Each sample was analyzed in triplicates and from three independent experiments and normalized to glyceraldehyde-3-phosphate

dehydrogenase (GAPDH) using the  $\Delta\Delta C_t$  (threshold cycle) method. The amplified product was checked by melting curve analysis spanning the temperature range from 65 °C to 95 °C with a ramping rate of 0.03 °C/s. The following primer sequences were used: USP14, forward, 5'GGCGAACAAGGGCAGTATC3', and reverse, 5'TCTGTTGCAGGACTCTCATCA3'; GAPDH, forward, 5'GGGTTCCCTATAAATACGGACTGC3', and reverse, 5'CCATTTTGTCTACGGGACGA3'.

### **Statistical analysis**

Statistical comparison was performed using Student's t-test or one-way/two-way ANOVA, depending on the experimental design. p value,  $p < 0.05$  was considered as statistically significant. Statistical analysis and graph design were performed using GraphPad PRISM software.

## Supplemental References

- Borodovsky, A., Ovaa, H., Kolli, N., Gan-Erdene, T., Wilkinson, K.D., Ploegh, H.L., and Kessler, B.M. (2002). Chemistry-based functional proteomics reveals novel members of the deubiquitinating enzyme family. *Chem. Biol.* *9*, 1149-1159.
- Burckstummer, T., Bennett, K.L., Preradovic, A., Schutze, G., Hantschel, O., Superti-Furga, G., and Bauch, A. (2006). An efficient tandem affinity purification procedure for interaction proteomics in mammalian cells. *Nat. Methods* *3*, 1013-1019.
- Do, H.T., Bruelle, C., Tselykh, T., Jalonen, P., Korhonen, L., and Lindholm, D. (2013). Reciprocal regulation of very low density lipoprotein receptors (VLDLRs) in neurons by brain-derived neurotrophic factor (BDNF) and Reelin: involvement of the E3 ligase Mylip/Idol. *J. Biol. Chem.* *288*, 29613-29620.
- Hyrskyluoto, A., Pulli, I., Tornqvist, K., Ho, T.H., Korhonen, L., and Lindholm, D. (2013). Sigma-1 receptor agonist PRE084 is protective against mutant huntingtin-induced cell degeneration: involvement of calpastatin and the NF-kappaB pathway. *Cell Death Dis.* *4*, e646.
- Kannike, K., Sepp, M., Zuccato, C., Cattaneo, E., and Timmusk, T. (2014). Forkhead transcription factor FOXO3a levels are increased in Huntington disease because of overactivated positive autofeedback loop. *J. Biol. Chem.* *289*, 32845-32857.
- Pham, D.D., Do, H.T., Bruelle, C., Kukkonen, J.P., Eriksson, O., Mogollon, I., Korhonen, L.T., Arumae, U., and Lindholm, D. (2016). p75 Neurotrophin Receptor Signaling Activates Sterol Regulatory Element-binding Protein-2 in Hepatocyte Cells via p38 Mitogen-activated Protein Kinase and Caspase-3. *J. Biol. Chem.* *291*, 10747-10758.
- Pham, D.D., Bruelle, C., Thi Do, H., Pajanoja, C., Jin, C., Srinivasan, V., Olkkonen, V.M., Eriksson, O., Jauhiainen, M., Lalowski, M., *et al.* (2019). Caspase-2 and p75 neurotrophin receptor (p75NTR) are involved in the regulation of SREBP and lipid genes in hepatocyte cells. *Cell Death Dis.* *10*, 537.
- Scifo, E., Szwajda, A., Debski, J., Uusi-Rauva, K., Kesti, T., Dadlez, M., Gingras, A.C., Tynnela, J., Baumann, M.H., Jalanko, A., *et al.* (2013). Drafting the CLN3 protein interactome in SH-SY5Y human neuroblastoma cells: a label-free quantitative proteomics approach. *J. Proteome Res.* *12*, 2101-2115.
- Scifo, E., Szwajda, A., Soliymani, R., Pezzini, F., Bianchi, M., Dapkunas, A., Debski, J., Uusi-Rauva, K., Dadlez, M., Gingras, A.C., *et al.* (2015a). Proteomic analysis of the palmitoyl protein thioesterase 1 interactome in SH-SY5Y human neuroblastoma cells. *J. Proteomics* *123*, 42-53.

Scifo, E., Szwajda, A., Soliymani, R., Pezzini, F., Bianchi, M., Dapkunas, A., Debski, J., Uusi-Rauva, K., Dadlez, M., Gingras, A.C., *et al.* (2015b). Quantitative analysis of PPT1 interactome in human neuroblastoma cells. *Data Brief* 4, 207-216.

Wang, Q., Li, L., and Ye, Y. (2006). Regulation of retrotranslocation by p97-associated deubiquitinating enzyme ataxin-3. *J. Cell Biol.* 174, 963-971.
